# Supplementary material
Source: publisher site journal article supplement (http://kjim.org/upload/media/kjim-2021-539-suppl3.pdf)
Supplement: Supplementary file 1 [file kjim-2021-539-suppl3.pdf]

**Supplementary Table 3. Baseline characteristics of the patients who did not receive PCI or coronary artery bypass graft, or received failed PCI**

| Characteristic                   | Before propensity score weighting method |                              | p value |
|----------------------------------|------------------------------------------|------------------------------|---------|
|                                  | On-hours group<br>(n = 98)               | Off-hours group<br>(n = 155) |         |
| Male patients                    | 55 (56.1)                                | 86 (55.5)                    | 0.921   |
| Age, yr                          | 74.78 ± 11.28                            | 73.25 ± 12.07                | 0.317   |
| Age ≥ 65 years                   | 78 (79.6)                                | 118 (76.1)                   | 0.521   |
| First medical contact            |                                          |                              | 0.734   |
| Emergency medical service        | 13 (13.3)                                | 28 (18.1)                    |         |
| No emergency medical service     | 85 (86.7)                                | 127 (82.0)                   |         |
| PCI-capable center               | 22 (22.4)                                | 26 (16.8)                    |         |
| PCI-incapable center             | 63 (64.3)                                | 101 (65.2)                   |         |
| Onset-to-door time ≥ 4 hours     | 66 (67.3)                                | 89 (57.4)                    | 0.114   |
| Pulse pressure, mmHg             | 46.03 ± 20.07                            | 46.54 ± 21.71                | 0.852   |
| Pulse pressure ≥ 40 mmHg         | 64 (66.7)                                | 113 (72.9)                   | 0.292   |
| Killip functional classification |                                          |                              | 0.268   |
| Killip functional class III      | 68 (69.4)                                | 97 (62.6)                    |         |
| Killip functional class IV       | 30 (30.6)                                | 58 (37.4)                    |         |
| BMI, kg/m <sup>2</sup>           | 22.22 ± 3.19                             | 22.49 ± 3.17                 | 0.535   |
| BMI ≥ 25 kg/m <sup>2</sup>       | 15 (17.6)                                | 30 (23.1)                    | 0.339   |
| Previous history                 |                                          |                              |         |
| Hypertension                     | 63 (64.3)                                | 103 (66.5)                   | 0.724   |
| Diabetes mellitus                | 40 (40.8)                                | 70 (45.2)                    | 0.497   |
| Dyslipidemia                     | 8 (8.2)                                  | 9 (5.8)                      | 0.466   |
| Prior MI                         | 20 (20.4)                                | 22 (14.2)                    | 0.196   |
| Prior heart failure              | 6 (6.1)                                  | 10 (6.5)                     | 0.917   |
| Prior CVA                        | 16 (16.7)                                | 24 (15.7)                    | 0.838   |
| Smoking                          | 37 (37.8)                                | 58 (37.4)                    | 0.957   |
| Family history of CAD            | 2 (2.2)                                  | 4 (2.7)                      | 1.000   |
| LVEF, %                          | 40.40 ± 14.66                            | 41.12 ± 14.94                | 0.744   |
| LVEF < 40%                       | 36 (48.6)                                | 54 (47.4)                    | 0.864   |
| STEMI diagnosis                  | 34 (34.7)                                | 51 (32.9)                    | 0.769   |
| Use of thrombolysis              | 0                                        | 3 (1.9)                      | 0.285   |
| Discharge medications            |                                          |                              |         |
| Aspirin                          | 91 (92.9)                                | 149 (96.1)                   | 0.251   |
| P2Y12 inhibitor                  | 87 (88.8)                                | 143 (92.3)                   | 0.348   |
| Calcium channel blocker          | 16 (16.3)                                | 18 (11.6)                    | 0.284   |
| Beta-blocker                     | 54 (55.1)                                | 70 (45.2)                    | 0.123   |
| ACE inhibitor or ARB             | 54 (55.1)                                | 73 (47.1)                    | 0.215   |
| Statin                           | 56 (57.1)                                | 88 (56.8)                    | 0.954   |

Values are presented as number (%) or mean ± standard deviation.

PCI, percutaneous coronary intervention; BMI, body mass index; MI, myocardial infarction; CVA, cerebrovascular accident; CAD, coronary artery disease; LVEF, left ventricular ejection fraction; STEMI, ST-segment elevation myocardial infarction; ACE, angiotensin-converting enzyme; ARB, angiotensin receptor blocker.
